# Supplementary material for: Identification of Ideal Allele Combinations for the Adaptation of Spring Barley to Northern Latitudes
Source: Front Plant Sci. 2019 May 3;10:542. doi: 10.3389/fpls.2019.00542 (PMC6510284; doi:10.3389/fpls.2019.00542)
Supplement: Supplementary file 2 [file Table_2.xlsx]

## Sheet: Overall PPP169
Table S2. Descriptive statistics for the PPP169 panel: overall for the combined environments, and separately for each environment. Number of observations (n), mean, standard deviation (sd), median, median absolute deviation (mad), minimum (min), maximum (max), range, skew, kurtosis, standard error (se). The traits included days from sowing to heading (HD), accumulated heat sum from sowing to head…
	n	mean	sd	median	mad	min	max	range	skew	kurtosis	se
Ht31	1352	9.96	3.64	9	2.97	4	33	29	1.46	3.03	0.10
Ht32	1352	15.40	5.76	14	4.45	2	45	43	1.30	2.07	0.16
Ht34	1352	23.43	8.23	20	5.93	11	58	47	1.10	0.69	0.22
StL	3885	64.45	12.79	64	13.34	28	115	87	0.42	0.18	0.21
HD	5233	63.06	16.09	64	20.76	19	94	75	0.18	-1.04	0.22
GFP	2364	39.90	7.94	39	7.41	24	64	40	0.49	-0.06	0.16
MD	2366	100.85	19.73	97	20.76	59	145	86	0.44	-0.99	0.41
HSHD	5233	780.65	108.45	790	114.16	301	1059	758	-0.30	-0.06	1.50
HSGFP	2196	644.39	91.89	636	79.32	390	928	538	0.52	0.16	1.96
HSMD	2364	1461.10	165.12	1454	200.15	1019	1792	773	-0.03	-0.92	3.40
LD	2026	3.73	2.39	3	2.97	1	9	8	0.58	-0.86	0.05
SB	1690	3.77	2.47	3	2.97	1	9	8	0.83	-0.34	0.06

## Sheet: Jokioinen_2012
	n	mean	sd	median	mad	min	max	range	skew	kurtosis	se
HD	338	51.68	2.48	52.0	1.48	46.0	57	11.0	-0.30	-0.44	0.13
HSHD	338	714.85	37.53	720.6	22.68	627.1	794	166.9	-0.37	-0.43	2.04

## Sheet: Jokioinen_2013
	n	mean	sd	median	mad	min	max	range	skew	kurtosis	se
StL	338	48.83	5.74	49.00	4.45	28.0	63.0	35.0	-0.38	0.64	0.31
HD	338	48.92	2.03	49.50	2.22	43.0	54.0	11.0	-0.64	-0.05	0.11
GFP	338	37.05	3.00	38.00	2.22	27.0	43.0	16.0	-0.98	0.43	0.16
MD	338	85.97	4.49	88.00	1.48	72.0	93.0	21.0	-1.08	0.00	0.24
HSHD	338	801.59	34.81	811.85	39.21	701.9	885.7	183.8	-0.61	-0.23	1.89
HSGFP	338	616.62	50.43	634.00	35.21	436.2	710.5	274.3	-1.14	0.89	2.74
HSMD	338	1418.20	75.86	1454.40	22.39	1171.9	1532.0	360.1	-1.21	0.30	4.13

## Sheet: Korpa_2012
	n	mean	sd	median	mad	min	max	range	skew	kurtosis	se
Ht31	338	11.47	3.91	10.00	2.97	6	27.00	21.00	1.01	0.56	0.21
Ht32	338	15.22	5.23	13.00	4.45	8	35.00	27.00	0.99	0.25	0.28
Ht34	338	20.97	7.51	18.00	4.45	11	50.00	39.00	1.21	1.05	0.41
StL	338	72.90	15.55	67.00	10.38	48	115.00	67.00	0.84	-0.53	0.85
HD	338	78.73	3.37	78.00	4.45	66	84.00	18.00	-0.76	0.90	0.18
GFP	338	52.11	5.95	52.00	8.90	40	64.00	24.00	-0.18	-0.94	0.32
MD	338	130.83	7.93	133.00	8.90	109	145.00	36.00	-0.49	-0.63	0.43
HSHD	338	644.79	42.57	635.00	57.82	488	712.00	224.00	-0.69	0.66	2.32
HSGFP	338	649.45	61.72	662.00	65.23	495	767.00	272.00	-0.42	-0.68	3.36
HSMD	338	1294.20	86.37	1319.00	75.61	1019	1418.00	399.00	-0.84	0.05	4.70
LD	338	3.29	1.30	3.29	1.69	1	9.00	8.00	0.54	0.77	0.07
SB	338	1.72	1.06	1.00	0.00	1	5.44	4.44	1.49	1.46	0.06

## Sheet: Korpa_2013
	n	mean	sd	median	mad	min	max	range	skew	kurtosis	se
Ht31	338	9.57	3.42	9.00	2.97	4.00	25.00	21.00	1.25	2.02	0.19
Ht32	338	15.14	6.11	13.00	4.45	6.00	40.00	34.00	1.25	1.55	0.33
Ht34	338	24.56	8.39	21.00	5.93	13.00	53.00	40.00	1.12	0.61	0.46
StL	338	64.29	12.41	60.00	10.38	48.00	99.00	51.00	0.82	-0.54	0.68
HD	338	86.90	4.15	88.00	2.97	68.00	94.00	26.00	-1.61	4.08	0.23
HSHD	338	752.60	49.83	765.00	38.55	543.00	838.00	295.00	-1.32	2.62	2.71
LD	338	2.32	1.34	2.00	1.48	1.00	8.00	7.00	1.55	3.18	0.07
SB	338	3.98	1.78	3.67	1.32	1.89	8.11	6.22	0.60	-0.76	0.10

## Sheet: Korpa_2014
	n	mean	sd	median	mad	min	max	range	skew	kurtosis	se
StL	338	62.52	9.82	60.0	8.90	45	95	50	0.70	-0.05	0.53
LD	338	5.24	2.47	6.0	2.97	1	9	8	-0.07	-1.40	0.13
SB	338	2.24	1.24	2.0	1.48	1	8	7	1.36	2.42	0.07

## Sheet: Laberw_2012
	n	mean	sd	median	mad	min	max	range	skew	kurtosis	se
StL	338	48.83	5.74	49.00	4.45	28.0	63.0	35.0	-0.38	0.64	0.31
HD	338	48.92	2.03	49.50	2.22	43.0	54.0	11.0	-0.64	-0.05	0.11
GFP	338	37.05	3.00	38.00	2.22	27.0	43.0	16.0	-0.98	0.43	0.16
MD	338	85.97	4.49	88.00	1.48	72.0	93.0	21.0	-1.08	0.00	0.24
HSHD	338	801.59	34.81	811.85	39.21	701.9	885.7	183.8	-0.61	-0.23	1.89
HSGFP	338	616.62	50.43	634.00	35.21	436.2	710.5	274.3	-1.14	0.89	2.74
HSMD	338	1418.20	75.86	1454.40	22.39	1171.9	1532.0	360.1	-1.21	0.30	4.13

## Sheet: Laberw_2013
	n	mean	sd	median	mad	min	max	range	skew	kurtosis	se
StL	338	48.83	5.74	49.00	4.45	28.0	63.0	35.0	-0.38	0.64	0.31
HD	338	48.92	2.03	49.50	2.22	43.0	54.0	11.0	-0.64	-0.05	0.11
GFP	338	37.05	3.00	38.00	2.22	27.0	43.0	16.0	-0.98	0.43	0.16
MD	338	85.97	4.49	88.00	1.48	72.0	93.0	21.0	-1.08	0.00	0.24
HSHD	338	801.59	34.81	811.85	39.21	701.9	885.7	183.8	-0.61	-0.23	1.89
HSGFP	338	616.62	50.43	634.00	35.21	436.2	710.5	274.3	-1.14	0.89	2.74
HSMD	338	1418.20	75.86	1454.40	22.39	1171.9	1532.0	360.1	-1.21	0.30	4.13

## Sheet: Staur_2012
	n	mean	sd	median	mad	min	max	range	skew	kurtosis	se
StL	336	77.18	8.67	75.0	7.41	57	108.0	51.0	0.60	0.28	0.47
HD	336	49.91	2.80	50.0	2.97	37	55.0	18.0	-1.58	4.06	0.15
GFP	338	5.52	2.04	6.0	1.48	1	12.0	11.0	0.16	-0.10	0.11
MD	338	97.17	4.20	97.0	2.97	59	104.0	45.0	-4.49	38.30	0.23
HSHD	338	10.02	2.57	10.0	2.97	1	16.0	15.0	-0.82	0.49	0.14
HSGFP	338	90.95	42.49	99.0	47.44	1	165.0	164.0	-0.35	-0.94	2.31
HSMD	338	8.48	2.96	8.0	2.97	1	16.0	15.0	-0.08	-0.32	0.16

## Sheet: Staur_2013
	vars	n	mean	sd	median	mad	min	max	range	skew	kurtosis	se
StL	13	338	50.01	7.60	50.00	7.41	35.00	75.0	40.00	0.40	0.02	0.41
HD	14	338	45.46	2.88	46.00	2.97	34.00	50.0	16.00	-1.09	1.90	0.16
GFP	15	338	38.47	4.94	38.00	4.45	24.00	51.0	27.00	-0.28	0.18	0.27
MD	16	338	83.93	6.72	85.00	5.93	60.00	96.0	36.00	-0.93	1.02	0.37
HSHD	17	338	874.45	65.57	888.70	64.79	622.25	974.8	352.55	-1.06	1.63	3.57
HSGFP	18	338	691.32	64.58	681.10	55.60	466.60	927.8	461.20	0.47	0.64	3.51
HSMD	19	338	1585.20	116.62	1600.15	108.97	1170.80	1791.9	621.10	-0.91	1.03	6.34

[truncated: 10 more sheets: Staur_2014, Odder_2012, Odder_2013, Horsens_2012, Horsens_2013, Horsens_2014, Bjertorp_2012, Bjertorp_2013, Svalöv_2012, Svalöv_2013]
