# Supplementary material for: Identification of Ideal Allele Combinations for the Adaptation of Spring Barley to Northern Latitudes
Source: Front Plant Sci. 2019 May 3;10:542. doi: 10.3389/fpls.2019.00542 (PMC6510284; doi:10.3389/fpls.2019.00542)
Supplement: Supplementary file 3 [file Table_3.xlsx]

## Sheet: Overall PPP124
Table S3. Descriptive statistics for the PPP124 panel: overall for the combined environments, and separately for each environment. Number of observations (n), mean, standard deviation (sd), median, median absolute deviation (mad), minimum (min), maximum (max), range, skew, kurtosis, standard error (se). The traits included days from sowing to heading (HD), accumulated heat sum from sowing to head…
	n	mean	sd	median	mad	min	max	range	skew	kurtosis	se
Ht31	992	8.69	2.35	8.0	1.48	4	20	16	1.31	2.63	0.07
Ht32	992	13.25	3.80	12.0	2.97	2	31	29	1.42	2.65	0.12
Ht34	992	20.04	5.33	19.0	2.97	11	43	32	1.63	2.99	0.17
StL	2852	62.38	10.56	61.0	11.86	35	108	73	0.20	-0.06	0.20
HD	3840	64.52	16.13	66.0	20.76	27	94	67	0.18	-1.17	0.26
GFP	1736	40.52	8.00	39.0	5.93	25	64	39	0.58	0.00	0.19
MD	1736	102.76	19.54	98.0	17.79	70	145	75	0.50	-1.05	0.47
HSGFP	1736	667.90	100.22	651.0	91.92	390	928	538	0.36	-0.37	2.41
HSMD	1736	1491.24	157.74	1467.0	194.22	1053	1792	739	-0.05	-1.03	3.79
HSHD	3840	803.40	102.33	820.0	102.30	424	1059	635	-0.26	-0.38	1.65
LD	1488	3.72	2.42	3.0	2.97	1	9	8	0.59	-0.91	0.06
SB	1240	3.04	1.92	3.0	1.48	1	9	8	0.97	0.43	0.05

## Sheet: Jokioinen_2012
	n	mean	sd	median	mad	min	max	range	skew	kurtosis	se
HD	248	52.58	1.97	53.0	1.48	46	57	11	-0.53	1.33	0.13
HSHD	248	728.79	29.67	735.0	20.76	627	794	167	-0.65	1.53	1.88

## Sheet: Jokioinen_2013
	n	mean	sd	median	mad	min	max	range	skew	kurtosis	se
RTY	248	2.00	0.00	2.0	0.00	2	2	0	NaN	NaN	0.00
StL	248	49.09	4.99	49.0	4.45	35	63	28	-0.07	0.28	0.32
HD	248	49.70	1.58	50.0	1.48	43	54	11	-1.35	4.04	0.10
GFP	248	38.12	2.09	39.0	1.48	30	43	13	-1.35	2.60	0.13
MD	248	87.82	3.01	89.0	1.48	74	93	19	-2.31	5.79	0.19
HSGFP	248	634.00	34.14	644.0	22.24	489	711	222	-1.58	3.63	2.17
HSMD	248	1448.95	49.72	1467.0	19.27	1209	1532	323	-2.59	7.22	3.16
HSHD	248	814.90	27.05	820.0	25.20	702	886	184	-1.30	3.56	1.72

## Sheet: Korpa_2012
	n	mean	sd	median	mad	min	max	range	skew	kurtosis	se
Ht31	248	9.89	2.57	9.0	1.48	6	20	14	1.33	1.93	0.16
Ht32	248	13.04	3.41	12.0	2.97	8	28	20	1.61	2.96	0.22
Ht34	248	17.69	4.35	16.0	2.97	11	33	22	1.46	1.79	0.28
StL	248	66.19	9.01	65.0	5.93	48	102	54	1.23	2.04	0.57
HD	248	80.06	2.36	81.0	4.45	72	84	12	-0.28	0.45	0.15
GFP	248	53.67	5.77	55.0	4.45	40	64	24	-0.61	-0.34	0.37
MD	248	133.73	6.48	136.0	4.45	115	145	30	-0.89	0.31	0.41
HSGFP	248	664.10	59.13	677.0	59.30	510	767	257	-0.79	0.01	3.75
HSMD	248	1325.57	67.35	1351.0	47.44	1101	1418	317	-1.28	1.33	4.28
HSHD	248	661.65	30.30	674.0	56.34	562	712	150	-0.25	0.26	1.92
LD	248	2.88	1.10	3.0	1.48	1	6	5	0.62	0.61	0.07
SB	248	1.28	0.67	1.0	0.00	1	5	4	3.42	14.12	0.04

## Sheet: Korpa_2013
	n	mean	sd	median	mad	min	max	range	skew	kurtosis	se
Ht31	248	8.31	2.35	8.0	1.48	4	17	13	1.18	2.29	0.15
Ht32	248	12.81	4.20	12.0	2.97	6	31	25	1.56	2.49	0.27
Ht34	248	21.08	5.58	20.0	2.97	13	42	29	1.78	3.20	0.35
StL	248	58.88	7.59	58.0	5.93	48	90	42	1.38	2.18	0.48
HD	248	88.58	2.46	89.0	2.97	79	94	15	-1.06	2.15	0.16
HSHD	248	773.00	31.09	778.0	40.03	656	838	182	-0.95	1.70	1.97
LD	248	1.95	1.02	2.0	1.48	1	6	5	1.37	2.21	0.06
SB	248	3.58	1.39	3.0	1.48	2	8	6	0.58	-0.47	0.09

## Sheet: Korpa_2014
	n	mean	sd	median	mad	min	max	range	skew	kurtosis	se
StL	248	59.09	7.09	59.0	5.93	45	85	40	0.76	0.71	0.45
LD	248	5.08	2.57	5.0	2.97	1	9	8	0.02	-1.47	0.16
SB	248	1.88	0.95	2.0	1.48	1	6	5	1.14	1.37	0.06

## Sheet: Laberw_2012
	n	mean	sd	median	mad	min	max	range	skew	kurtosis	se
HD	248	38.85	3.20	39.0	2.97	27	45	18	-1.05	1.87	0.20
HSHD	248	621.81	50.33	627.0	35.58	424	715	291	-1.28	2.68	3.20

## Sheet: Laberw_2013
	n	mean	sd	median	mad	min	max	range	skew	kurtosis	se
HD	248	69.88	2.70	70.0	2.97	58	75	17	-1.40	2.92	0.17
HSHD	248	938.92	55.49	937.0	60.79	723	1059	336	-0.85	1.37	3.52

## Sheet: Staur_2012
	n	mean	sd	median	mad	min	max	range	skew	kurtosis	se
StL	248	74.81	6.77	75.0	5.93	57	108	51	0.99	3.11	0.43
HD	248	51.01	1.76	52.0	1.48	44	55	11	-1.13	1.81	0.11
GFP	248	47.52	1.98	47.5	2.22	43	52	9	0.10	-0.61	0.13
MD	248	98.53	2.34	98.0	2.97	93	104	11	0.05	-0.72	0.15
HSGFP	248	834.17	32.85	836.0	35.58	761	911	150	0.16	-0.61	2.09
HSMD	248	1691.30	37.59	1681.0	43.00	1607	1786	179	0.23	-0.73	2.39
HSHD	248	857.26	29.43	874.0	28.17	737	926	189	-1.09	1.84	1.87
LD	248	3.90	2.78	4.0	4.45	1	9	8	0.33	-1.41	0.18

## Sheet: Staur_2013
	n	mean	sd	median	mad	min	max	range	skew	kurtosis	se
StL	248	49.48	7.05	50.0	7.41	35	70	35	0.37	-0.06	0.45
HD	248	46.44	2.26	47.0	1.48	36	50	14	-1.26	3.46	0.14
GFP	248	40.16	4.10	40.0	4.45	29	51	22	-0.06	-0.09	0.26
MD	248	86.60	4.86	87.0	4.45	70	96	26	-1.06	1.85	0.31
HSGFP	248	733.98	71.51	726.0	78.58	554	928	374	0.10	-0.38	4.54
HSMD	248	1631.06	85.20	1637.0	80.06	1341	1792	451	-1.02	1.73	5.41
HSHD	248	897.02	51.37	911.0	32.62	660	975	315	-1.32	3.47	3.26

[truncated: 10 more sheets: Staur_2014, Odder_2012, Odder_2013, Horsens_2012, Horsens_2013, Horsens_2014, Bjertorp_2012, Bjertorp_2013, Svalöv_2012, Svalöv_2013]
